# Supplementary material for: Rubrene analogues with the aggregation-induced emission enhancement behaviour
Source: Royal Society of Chemistry journal article supplement (doi:10.1039/c3tc31794c), 2013-11-14
Supplement: c3tc31794c.pdf [file c3tc31794c.pdf]

# Rubrene Analogues with the Aggregation-Induced Emission Enhancement Behaviour

Xiaotao Zhang<sup>a</sup>, Jakob K. Sørensen<sup>b</sup>, Xiaolong Fu<sup>a</sup>, Yonggang Zhen<sup>\*a</sup>, Guangyao Zhao<sup>a</sup>, Lang Jiang<sup>a</sup>, Huanli Dong<sup>\*a</sup>, Jie Liu<sup>a</sup>, Zhigang Shuai<sup>c</sup>, Hua Geng<sup>a</sup>, Thomas Bjørnholm<sup>b</sup> and Wenping Hu<sup>\*a</sup>

<sup>a</sup> Beijing National Laboratory for Molecular Sciences, Key Laboratory of Organic Solids, Institute of Chemistry, Chinese Academy of Sciences, Beijing 100190, China; E-mail:

<sup>b</sup> Nano-Science Center and Department of Chemistry, University of Copenhagen, Universitetsparken 5, 2100, Copenhagen, Denmark

<sup>c</sup> Department of Chemistry, Tsinghua University, Beijing 100084 (P. R. China)

Correspondence: [zhenyg@iccas.ac.cn](mailto:zhenyg@iccas.ac.cn); [dhl522@iccas.ac.cn](mailto:dhl522@iccas.ac.cn); [huwp@iccas.ac.cn](mailto:huwp@iccas.ac.cn)

## Table of contents

|                                                                                               |    |
|-----------------------------------------------------------------------------------------------|----|
| <b>Figure S1.</b> <sup>1</sup> H NMR spectra of the compound <b>2</b> in CDCl <sub>3</sub> .  | S2 |
| <b>Figure S2.</b> <sup>13</sup> C NMR spectra of the compound <b>2</b> in CDCl <sub>3</sub> . | S2 |
| <b>Figure S3.</b> <sup>1</sup> H NMR spectra of the compound <b>3</b> in CDCl <sub>3</sub> .  | S3 |
| <b>Figure S4.</b> <sup>13</sup> C NMR spectra of the compound <b>3</b> in CDCl <sub>3</sub> . | S3 |
| <b>Figure S5.</b> <sup>1</sup> H NMR spectra of the compound <b>5</b> in CDCl <sub>3</sub> .  | S4 |
| <b>Figure S6.</b> <sup>13</sup> C NMR spectra of the compound <b>5</b> in CDCl <sub>3</sub> . | S4 |
| <b>Figure S7.</b> <sup>1</sup> H NMR spectra of the compound <b>6</b> in CDCl <sub>3</sub> .  | S5 |
| <b>Figure S8.</b> <sup>13</sup> C NMR spectra of the compound <b>6</b> in CDCl <sub>3</sub> . | S5 |
| <b>Figure S9.</b> PL spectra of Rubrene in different water–THF (v/v) mixtures.                | S6 |

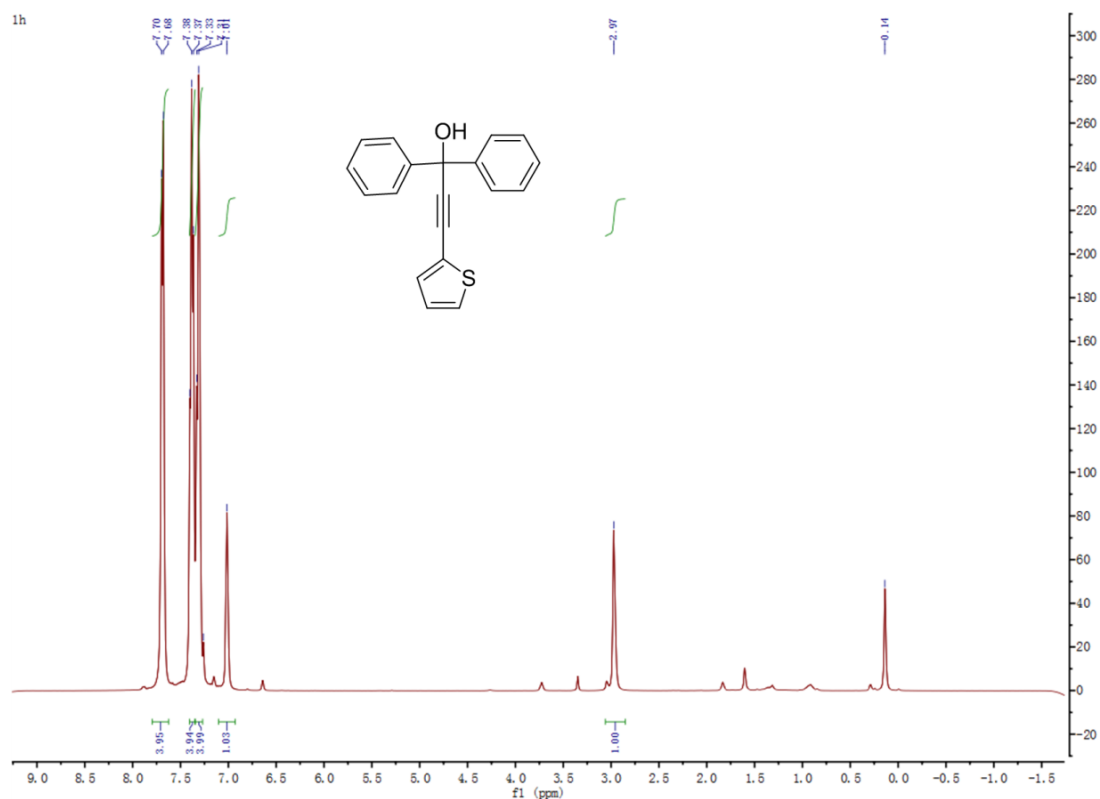

13C

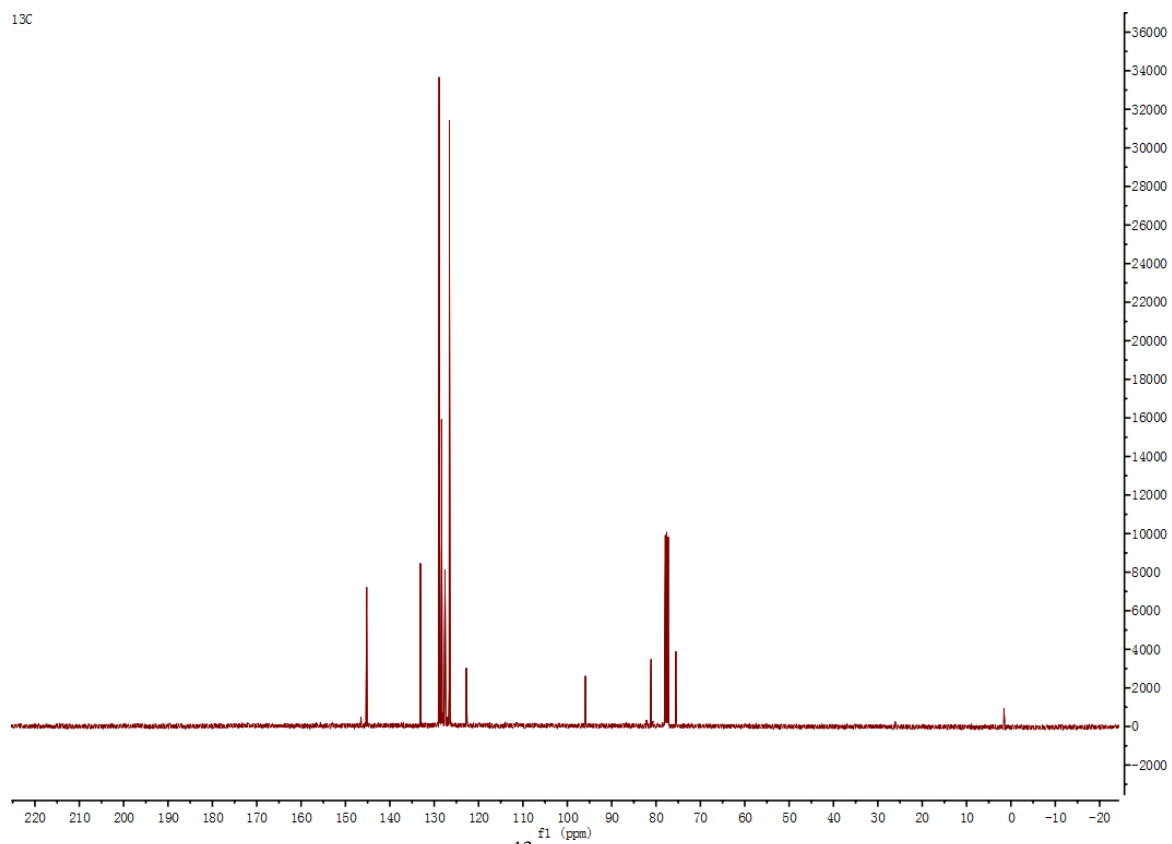

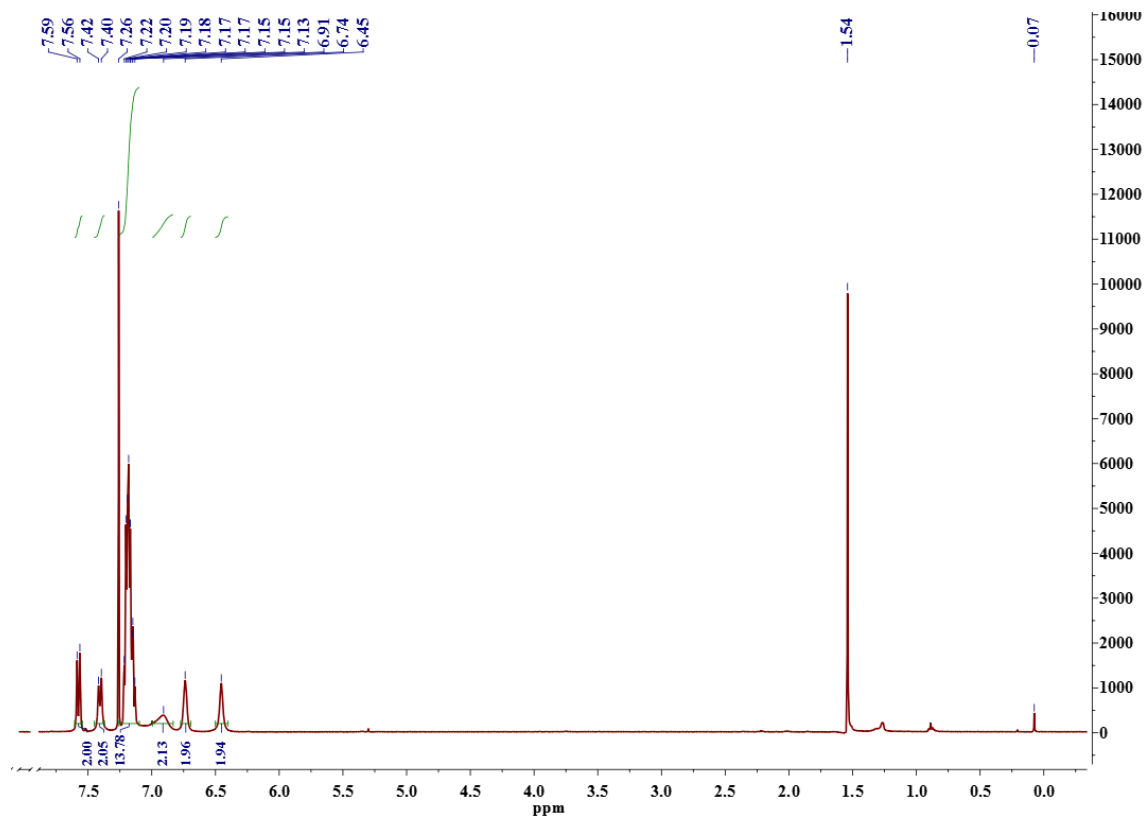

Figure S3. <sup>1</sup>H NMR of Compound 3

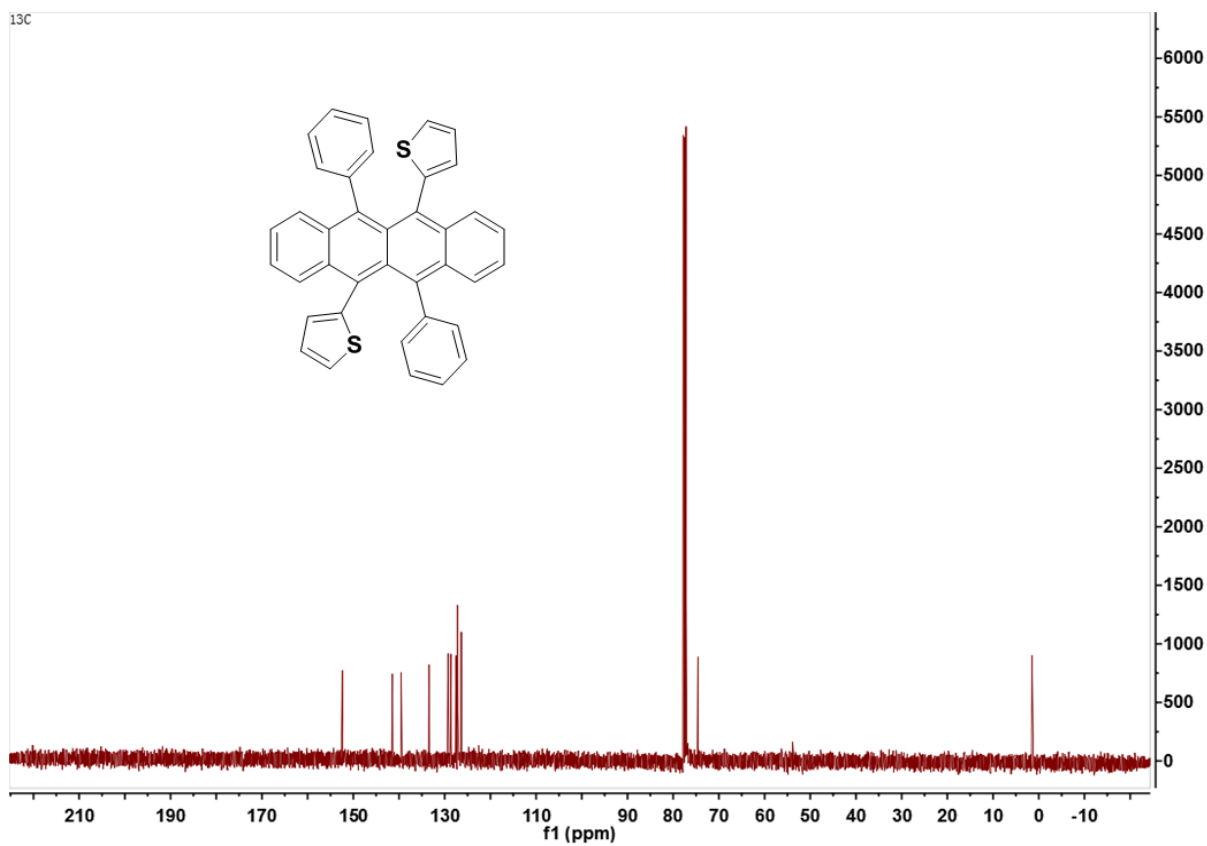

Figure S4. <sup>13</sup>C NMR of Compound 3

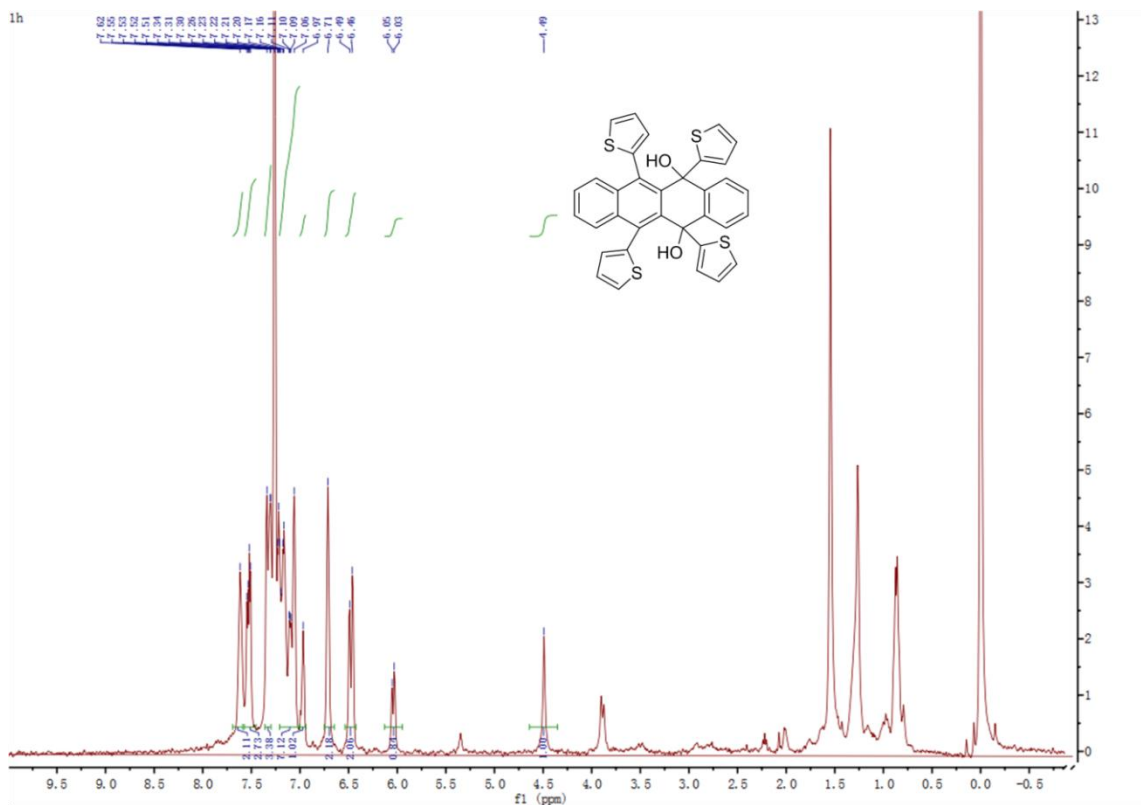

Figure S5. <sup>1</sup>H NMR of Compound 5

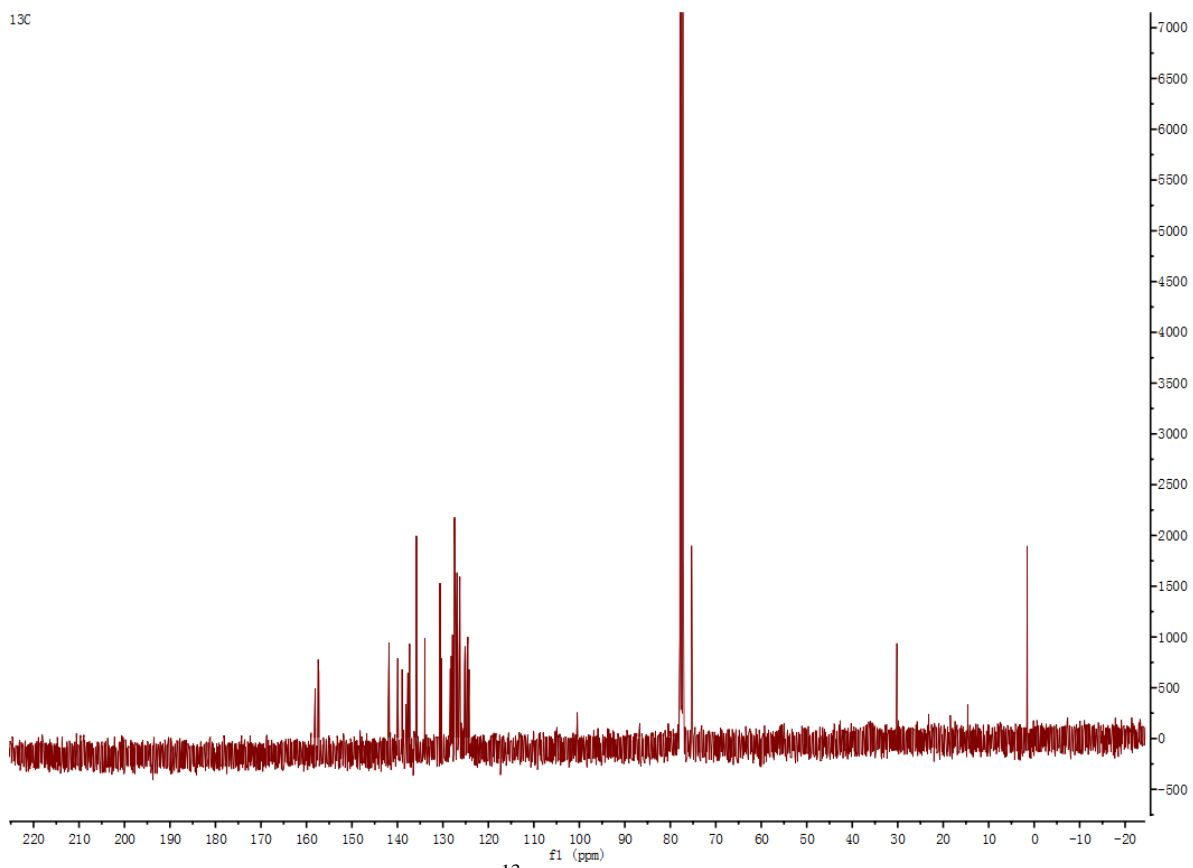

Figure S6. <sup>13</sup>C NMR of Compound 5

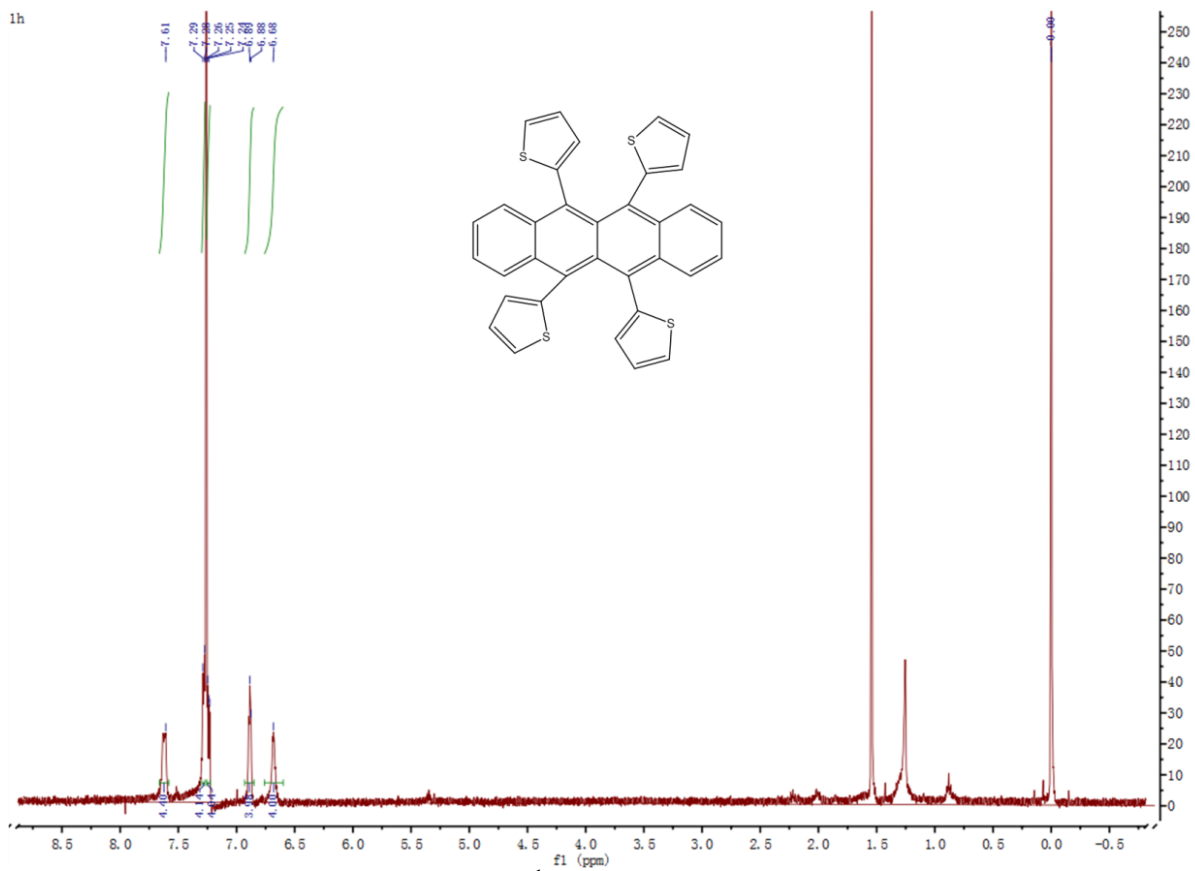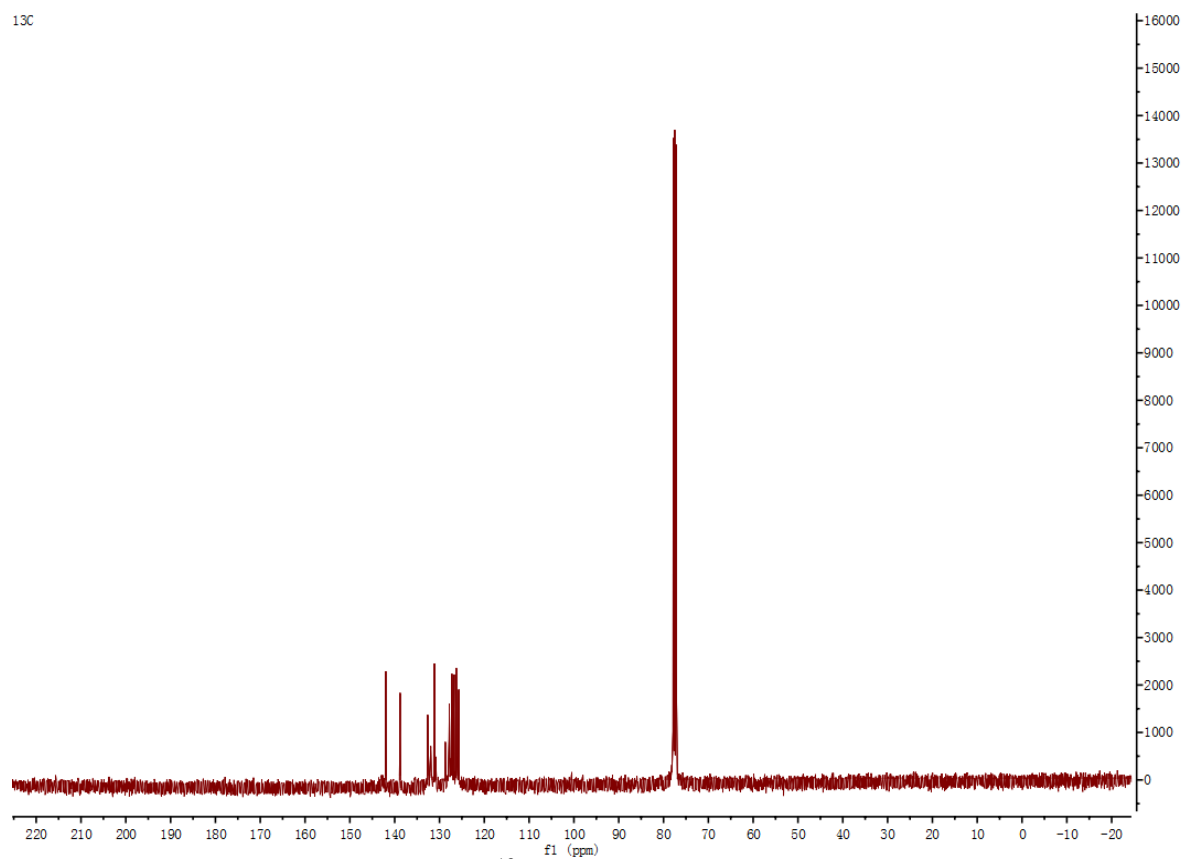

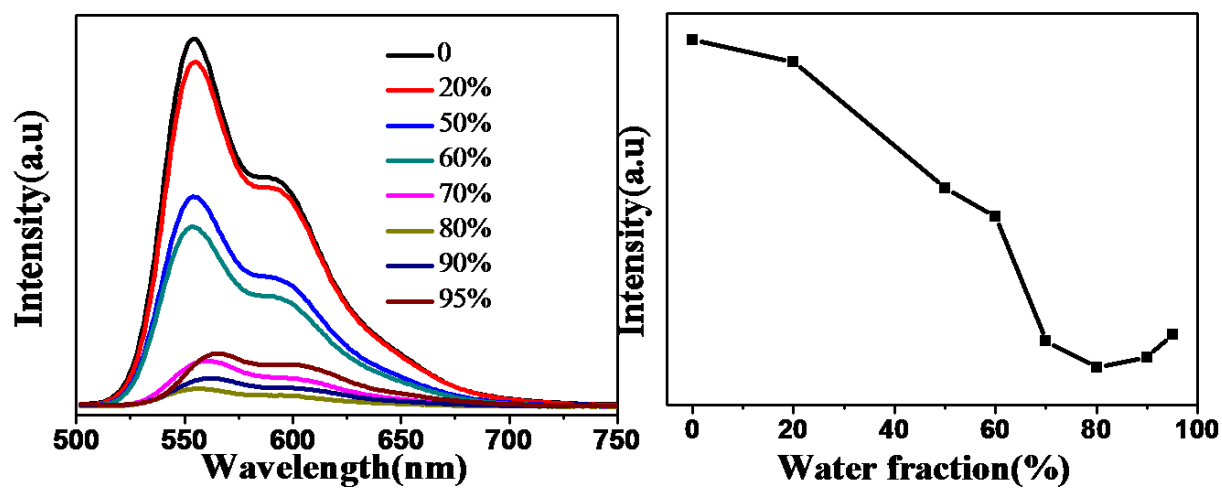

Figure S9. (L) PL spectra of Rubrene in different water-THF (v/v) mixtures. (R) The dependence of the PL intensity on the composition of water (inset: luminescent photo of the solid powder under 365 nm). The concentration was kept at 40 $\mu$ M, excitation wavelength: 492 nm.
